# Supplementary material for: Cold sensitivity of TRPA1 is unveiled by the prolyl hydroxylation blockade-induced sensitization to ROS
Source: PubMed Central journal article supplement (PMC5027619; doi:10.1038/ncomms12840), 2016-09-15
Supplement: ncomms12840-s1.pdf [file ncomms12840-s1.pdf]

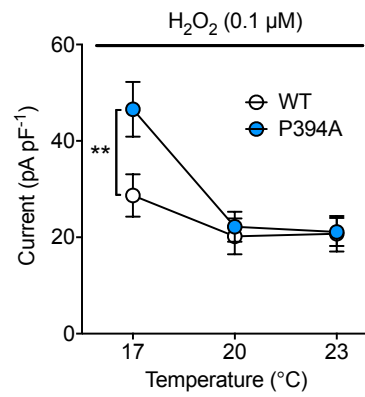

**Supplementary Figure 1 | Cold stimulation induces hTRPA1-P394A activation in the presence of H<sub>2</sub>O<sub>2</sub>.** Shown are temperature-current relationships at +80 mV obtained from whole-cell patch-clamp recordings as in Fig. 1.  $n = 8$ .  $**P < 0.01$ ; two-way ANOVA with Sidak's *post hoc* test. Data are expressed as mean  $\pm$  s.e.m.

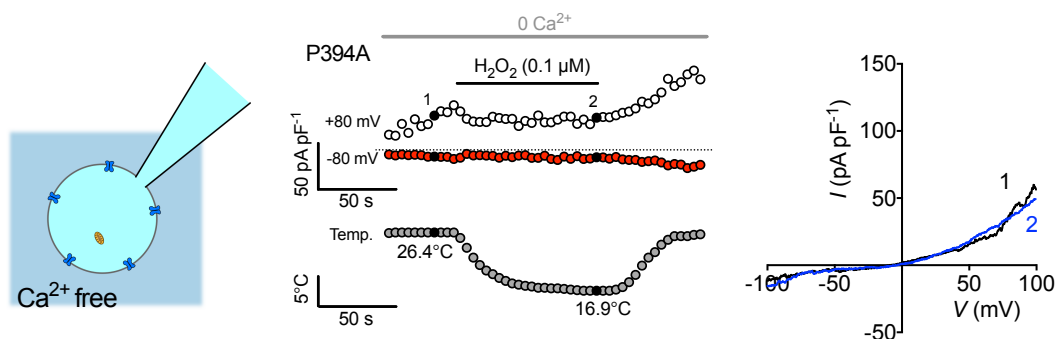

**Supplementary Figure 2 | Cold stimulation does not induce hTRPA1-P394A activation in the absence of extracellular  $\text{Ca}^{2+}$  ions.** A hTRPA1-P394A-expressing cell was exposed to cold and  $0.1 \mu\text{M H}_2\text{O}_2$  in a  $\text{Ca}^{2+}$ -free bath solution and analyzed by whole-cell patch clamp recordings. Shown are a schematic diagram of whole-cell patch clamp configurations used in this experiment, a whole-cell recording from a hTRPA1-P394A-expressing cell (a representative of six cells), and current-voltage relationships at the times indicated by the black-filled circles.

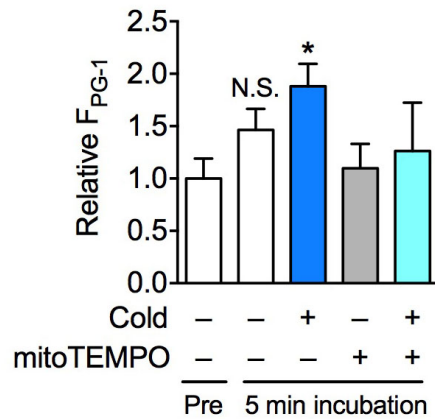

**Supplementary Figure 3 | Cold stimulation induces  $H_2O_2$  production in HEK293 cells.** HEK293 cells were incubated at  $37^\circ C$  or on ice for 5 min. The cells were then collected, and the intracellular  $H_2O_2$  level was measured using PG-1, a fluorescent probe with high selectivity for  $H_2O_2$ . MitoTEMPO was preloaded with PG-1.  $n = 6$ . N.S., not significant;  $*P < 0.05$  versus pre-incubation sample (Pre); unpaired  $t$  test. Data are expressed as mean  $\pm$  s.e.m.

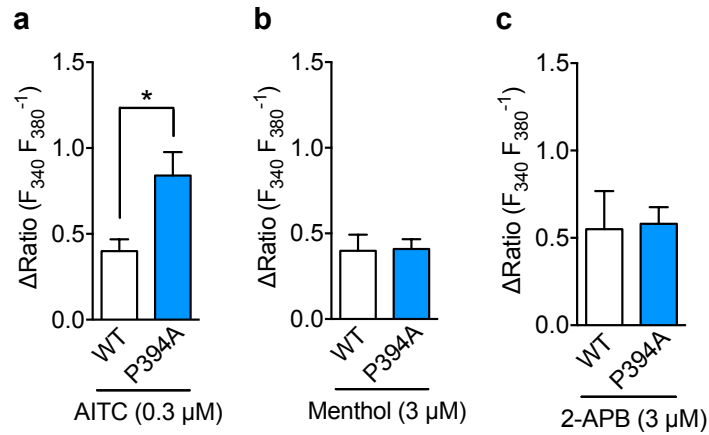

**Supplementary Figure 4 | Relief from prolyl hydroxylation of hTRPA1 enhances the response to AITC, but not menthol and 2-APB.** The hTRPA1-P394A-expressing cells were exposed to three TRPA1 agonists and analyzed using  $\text{Ca}^{2+}$  imaging experiments. Shown are statistical analyses of the  $[\text{Ca}^{2+}]_i$  responses evoked by 0.3  $\mu\text{M}$  AITC (a), 3  $\mu\text{M}$  menthol (b), or 3  $\mu\text{M}$  2-APB (c) in hTRPA1-WT- or hTRPA1-P394A-expressing cells ( $n = 5-6$ ).  $*P < 0.05$ ; unpaired  $t$  test. All data are expressed as mean  $\pm$  s.e.m.

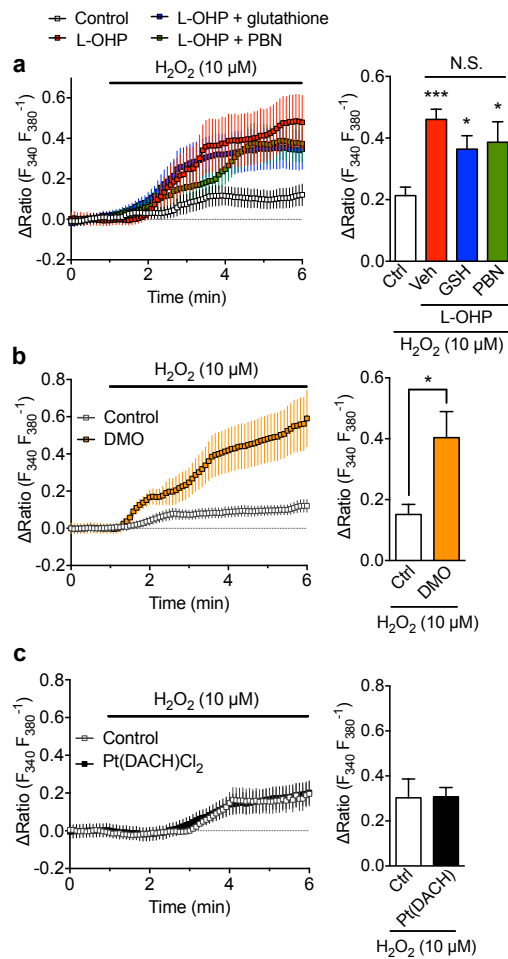

**Supplementary Figure 5 | L-OHP and DMO, but not Pt(DACH)Cl<sub>2</sub>, elicit hTRPA1 sensitization.** Shown are representative traces of H<sub>2</sub>O<sub>2</sub>-evoked [Ca<sup>2+</sup>]<sub>i</sub> responses in hTRPA1-WT-expressing cells pretreated with or without 100 μM L-OHP (**a**, *n* = 29–47 cells), 30 μM DMO (**b**, *n* = 44–57 cells), or 30 μM Pt(DACH)Cl<sub>2</sub> (**c**, *n* = 36–58 cells) for 2 h, and the statistical analysis (**a**, *n* = 5–12; **b**, *n* = 4; **c**, *n* = 6). Note that glutathione (1 mM) or PBN (10 mM) were co-pretreated for 2 h with L-OHP and washed out before starting Ca<sup>2+</sup> imaging experiments. N.S., not significant; \**P* < 0.05, \*\*\**P* < 0.001 versus control (Ctrl), if not otherwise indicated; one-way ANOVA with Tukey's *post hoc* test (**a**) and unpaired *t* test (**b**, **c**). All data are expressed as mean ± s.e.m.

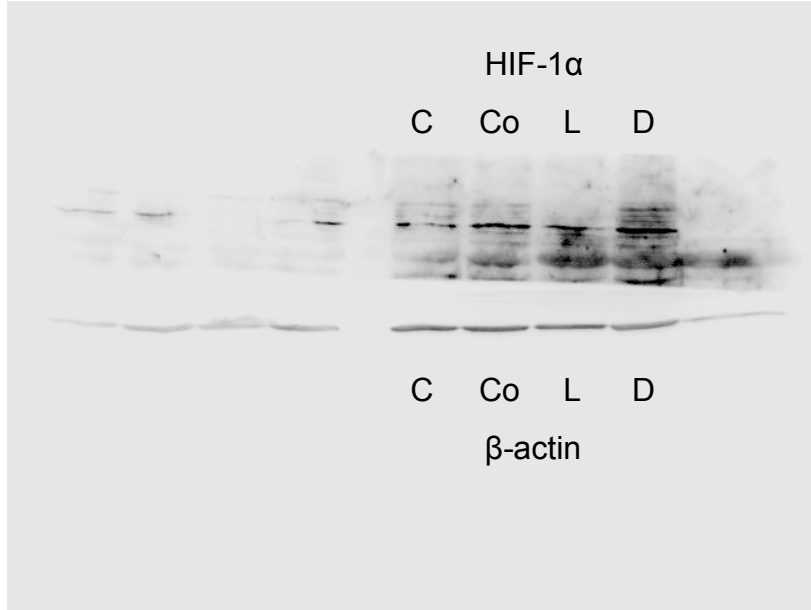

**Supplementary Figure 6 | Full image of western blotting experiment.** HEK293 cells western blotting result in Figure 6a. C, control; Co,  $\text{CoCl}_2$ ; L, L-OHP; D, DMO.

**Supplementary Table 1 | Primer sequences used for mTRPA1 cloning.**

| <b>Primer name</b> | <b>Sequences (5'→3')</b>          | <b>Restriction sites used for cloning</b> |
|--------------------|-----------------------------------|-------------------------------------------|
| mTRPA1(+)-28ReKoz  | aaactcgaggatccaccatgaagcgcg       | XhoI                                      |
| mTRPA1(-)-1226     | atctgcataaactcaggccgcaaattcttagtc |                                           |
| mTRPA1(+)-1059     | ctctccacttatttagcaacagcttctgcatcc |                                           |
| mTRPA1(-)-2509     | tgaggaacaagggaacacgaagatgatac     |                                           |
| mTRPA1(+)-2247     | caaaatacagcctggaatggccttcaattc    |                                           |
| mTRPA1(-)-3405Re   | aaaccggggtcgacctaaaagtccg         | Sall                                      |

The number in the primer name represents the target locus of mTRPA1 sequence.
